# Supplementary material
Source: PubMed Central journal article supplement (PMC9438924)
Supplement: ehp9855.s001.acco.pdf [file ehp9855.s001.acco.pdf]

**Note to readers with disabilities:** *EHP* strives to ensure that all journal content is accessible to all readers. However, some figures and Supplemental Material published in *EHP* articles may not conform to [508 standards](#) due to the complexity of the information being presented. If you need assistance accessing journal content, please contact [ehp508@niehs.nih.gov](mailto:ehp508@niehs.nih.gov). Our staff will work with you to assess and meet your accessibility needs within 3 working days.

### **Supplemental Material**

#### **The Intersection of Immigrant and Environmental Health: A Scoping Review of Observational Population Exposure and Epidemiologic Studies**

Kelvin C. Fong, Seulkee Heo, Chris C. Lim, Honghyok Kim, Alisha Chan, Whanhee Lee, Rory Stewart, Hayon Michelle Choi, Ji-Young Son, and Michelle L. Bell

#### **Table of Contents**

**Table S1.** Reviewed Studies' Exposure of Interest by Region, Disparity Focus, and Year Published.

**Figure S1.** Identification and Screening of Literature. Figure modeled after the *Preferred Reporting Items for Systematic Reviews and Meta-Analyses (PRISMA)* Guidelines. For inclusion, a study had to explore environmental exposure or environmental exposure health effect disparities between immigrants vs. non-immigrants in a non-randomized setting (*i.e.*, cohort study, case-control study, cross-sectional study, ecologic study, time-series).

#### **PICOS Worksheet and Search Strategy**

#### **References**

**Additional File-** Excel Document

**Table S1:** Reviewed Studies' Exposure of Interest by Region, Disparity Focus, and Year Published

|                        | <i>Exposure of Interest</i> |                      |              |
|------------------------|-----------------------------|----------------------|--------------|
|                        | <i>Endogenous Factors</i>   | <i>Air Pollution</i> | <i>Other</i> |
| <b>Region</b>          |                             |                      |              |
| Asia                   | 1                           | 0                    | 0            |
| Canada                 | 7                           | 5                    | 0            |
| Central America        | 1                           | 0                    | 0            |
| Europe                 | 2                           | 0                    | 2            |
| Middle East            | 0                           | 0                    | 1            |
| USA                    | 12                          | 12                   | 7            |
| <b>Disparity Focus</b> |                             |                      |              |
| Exposure               | 22                          | 11                   | 5            |
| Exposure and Health    | 1                           | 4                    | 0            |
| Health                 | 0                           | 2                    | 5            |
| <b>Year Published</b>  |                             |                      |              |
| 1984                   | 0                           | 0                    | 1            |
| 1999                   | 1                           | 0                    | 0            |
| 2002                   | 1                           | 0                    | 0            |
| 2007                   | 1                           | 0                    | 0            |
| 2011                   | 3                           | 0                    | 0            |
| 2012                   | 1                           | 0                    | 0            |
| 2014                   | 2                           | 0                    | 1            |
| 2015                   | 1                           | 2                    | 0            |
| 2016                   | 1                           | 0                    | 1            |
| 2017                   | 2                           | 3                    | 3            |
| 2018                   | 3                           | 0                    | 1            |
| 2019                   | 5                           | 5                    | 0            |
| 2020                   | 0                           | 3                    | 2            |
| 2021                   | 2                           | 4                    | 1            |

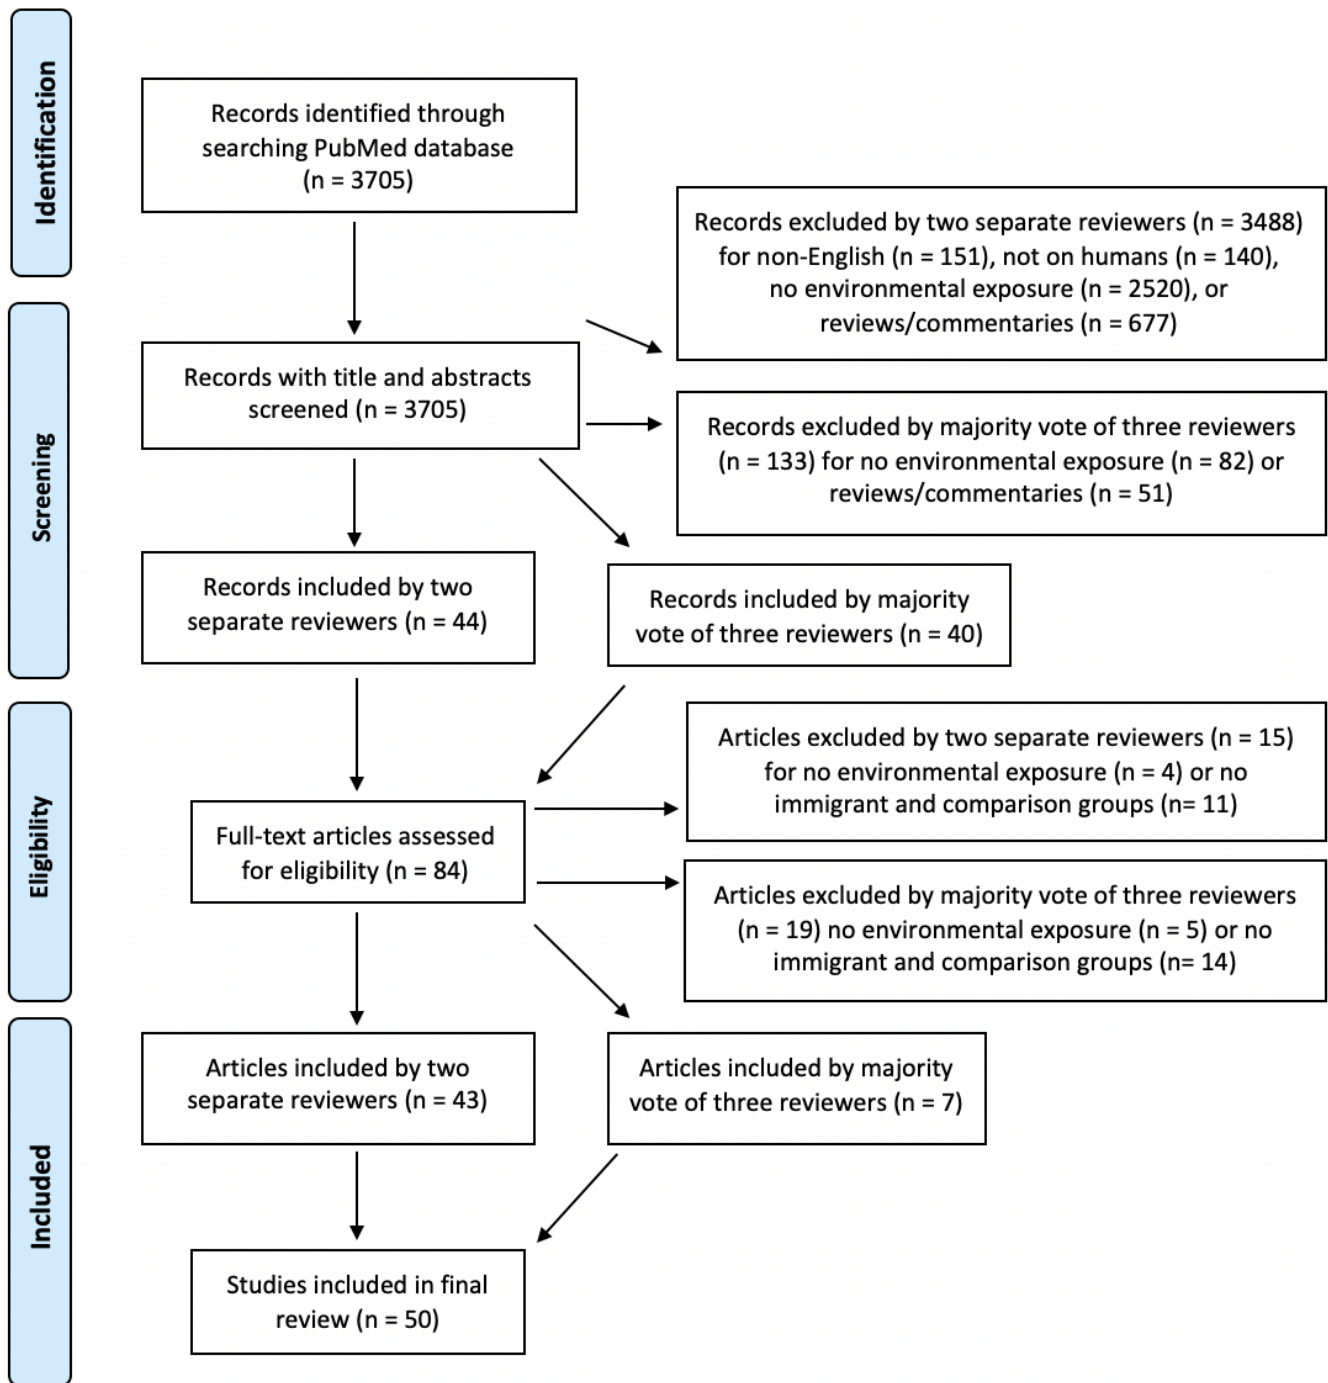

**Figure S1:**

Identification and Screening of Literature. Figure modeled after the *Preferred Reporting Items for Systematic Reviews and Meta-Analyses (PRISMA)* Guidelines.<sup>32</sup> For inclusion, a study had to explore environmental exposure or environmental exposure health effect disparities between immigrants vs. non-immigrants in a non-randomized setting (*i.e.*, cohort study, case-control study, cross-sectional study, ecologic study, time-series).

## PICOS Worksheet and Search Strategy

### 1. Define your question using PICOS by identifying:

| PICOS                          | Description                                                                                                                       |
|--------------------------------|-----------------------------------------------------------------------------------------------------------------------------------|
| <b>Patient / Problem</b>       | Humans – differential risks by immigrant status (foreign-born)                                                                    |
| <b>Intervention (exposure)</b> | Air pollution, heat, chemical, and other environmental exposures                                                                  |
| <b>Comparison</b>              | N/A                                                                                                                               |
| <b>Outcome</b>                 | Mortality and any Morbidities                                                                                                     |
| <b>Setting</b>                 | Non-randomized observational studies (i.e., cohort study, case-control study, cross-sectional study, ecologic study, time-series) |

Write out your question:

Do immigrants (foreign-born) experience differential health risks from environmental exposures such as air pollution and heat compared to the native-born?

2. Type of question/problem: **Circle one:** Therapy/Prevention, Diagnosis, Etiology, Prognosis

3. Type of study (Publication Type) to include in the search: **Check all that apply:**

- Meta-Analysis
- Systematic Review
- Randomized Controlled Trial
- Cohort Study
- Case Control Study
- Case series or Case Report
- Animal Research
- In Vitro/Lab Research
- Editorials, Letters, Opinions

4. List main topics and alternate terms from your PICOS question that can be used for your search

Environmental exposures, pollution, air pollution, temperature, heat, weather,  
Immigrant, foreign born, migrant  
Health disparities

5. List your inclusion criteria

Age: all ages

Year of publication: up to September 2021

Language: English

List irrelevant terms that you may want to exclude in your search

6. List where you plan to search, i.e.,

MEDLINE/PubMed

### PICOS inclusion and exclusion criteria

| Parameter           | Inclusion criteria                                                                                                                | Exclusion criteria                                                                                                                                                      |
|---------------------|-----------------------------------------------------------------------------------------------------------------------------------|-------------------------------------------------------------------------------------------------------------------------------------------------------------------------|
| <b>Patients</b>     | any                                                                                                                               |                                                                                                                                                                         |
| <b>Intervention</b> | Environmental exposures                                                                                                           | Studies not performed in human populations.<br>Studies without consideration for immigrant status / foreign-born / migrant status / nativity.<br>Occupational exposures |
| <b>Comparison</b>   | Environmental exposure effects in immigrants vs. non-immigrants                                                                   | Studies with no comparison groups                                                                                                                                       |
| <b>Outcomes</b>     | any                                                                                                                               |                                                                                                                                                                         |
| <b>Study design</b> | Non-randomized observational studies (i.e., cohort study, case-control study, cross-sectional study, ecologic study, time-series) | Not a population-based (epidemiology) study such as human exposure studies, toxicology, or ecology.<br>Review/commentary/news articles.                                 |

### Search strategy and criteria

("environmental exposure" OR "environment" OR "exposure" OR "air pollution" OR "pollution" OR "heat" OR "temperature" OR "weather")

AND

("immigrant" OR "foreign born" OR "nativity" OR "migrant" OR "native born" OR "US born")

### Data extraction variables

Title, Study Population, Location and Time, Comparison Groups (if applicable), Exposure, Outcome, Statistical Methods, Results / Estimates of Effect, Conclusion

### Supplementary Material References

32. Moher D, Liberati A, Tetzlaff J, Altman DG, Group P. 2009. Preferred reporting items for systematic reviews and meta-analyses: the PRISMA statement. *BMJ* 339:b2535. PMID: 19622551, 10.1136/bmj.b2535.
33. Daniels SI, Chambers JC, Sanchez SS, La Merrill MA, Hubbard AE, Macherone A, et al. 2018. Elevated levels of organochlorine pesticides in South Asian immigrants are associated With an increased risk of diabetes. *J Endocr Soc* 2(8):832-841. PMID: 30019022, 10.1210/js.2017-00480.
34. Rothenberg SJ, Manalo M, Jiang J, Khan F, Cuellar R, Reyes S, et al. 1999. Maternal blood lead level during pregnancy in South Central Los Angeles. *Arch Environ Health* 54(3):151-157. PMID: 10444035, 10.1080/00039899909602253.
35. Klitzman S, Sharma A, Nicaj L, Vitkevich R, Leighton J. 2002. Lead poisoning among pregnant women in New York City: risk factors and screening practices. *Journal of urban health : bulletin of the New York Academy of Medicine* 79(2):225-237. PMID: 12023498, 10.1093/jurban/79.2.225.
36. Eisenberg KW, van Wijngaarden E, Fisher SG, Korfmacher KS, Campbell JR, Fernandez ID, et al. 2011. Blood lead levels of refugee children resettled in Massachusetts, 2000 to 2007. *Am J Public Health* 101(1):48-54. PMID: 21088268, 10.2105/AJPH.2009.184408.
37. Perla ME, Rue T, Cheadle A, Krieger J, Karr CJ. 2015. Population-based comparison of biomarker concentrations for chemicals of concern among Latino-American and non-Hispanic white children. *Journal of immigrant and minority health* 17(3):802-819. PMID: 24668388, 10.1007/s10903-014-0002-2.
38. Pezzi C, Lee D, Kennedy L, Aguirre J, Titus M, Ford R, et al. 2019. Blood lead levels among resettled refugee children in select US states, 2010-2014. *Pediatrics* 143(5):e20182591. PMID: 30996119, 10.1542/peds.2018-2591.
39. Bulka CM, Bommarito PA, Fry RC. 2019. Predictors of toxic metal exposures among US women of reproductive age. *J Expo Sci Environ Epidemiol* 29(5):597-612. PMID: 31235790, 10.1038/s41370-019-0152-3.
40. Savadatti SS, Liu M, Caglayan C, Reuther J, Lewis-Michl EL, Aldous KM, et al. 2019. Biomonitoring of populations in Western New York at risk for exposure to Great Lakes contaminants. *Environmental research* 179(Pt A):108690. PMID: 31491725, 10.1016/j.envres.2019.108690.
41. Muennig P, Song X, Payne-Sturges DC, Gee GC. 2011. Blood and urine levels of long half-life toxicants by nativity among immigrants to the United States. *Sci Total Environ* 412-413:109-113. PMID: 22088424, 10.1016/j.scitotenv.2011.09.077.

42. Ritchey MD, Scalia Sucusky M, Jefferies T, McCormick D, Hesting A, Blanton C, et al. 2011. Lead poisoning among Burmese refugee children--Indiana, 2009. *Clin Pediatr (Phila)* 50(7):648-656. PMID: 21398347, 10.1177/0009922811398958.
43. Farzan SF, Howe CG, Chavez TA, Hodes TL, Johnston JE, Habre R, et al. 2021. Demographic predictors of urinary arsenic in a low-income predominantly Hispanic pregnancy cohort in Los Angeles. *J Expo Sci Environ Epidemiol* 31(1):94-107. PMID: 32719440, 10.1038/s41370-020-0251-1.
44. Mitro SD, Chu MT, Dodson RE, Adamkiewicz G, Chie L, Brown FM, et al. 2019. Phthalate metabolite exposures among immigrants living in the United States: findings from NHANES, 1999-2014. *J Expo Sci Environ Epidemiol* 29(1):71-82. PMID: 29572484, 10.1038/s41370-018-0029-x.
45. Parnia A, Chakravartty D, Wiseman CLS, Archbold J, Copes R, Zawar N, et al. 2018. Environmental factors associated with blood lead among newcomer women from South and East Asia in the Greater Toronto Area. *Sci Total Environ* 624:558-566. PMID: 29268227, 10.1016/j.scitotenv.2017.11.336.
46. Wiseman CLS, Parnia A, Chakravartty D, Archbold J, Copes R, Cole D. 2019. Total, methyl and inorganic mercury concentrations in blood and environmental exposure sources in newcomer women in Toronto, Canada. *Environmental research* 169:261-271. PMID: 30481602, 10.1016/j.envres.2018.11.011.
47. Wiseman CLS, Parnia A, Chakravartty D, Archbold J, Zawar N, Copes R, et al. 2017. Blood cadmium concentrations and environmental exposure sources in newcomer South and East Asian women in the Greater Toronto Area, Canada. *Environmental research* 154:19-27. PMID: 28012400, 10.1016/j.envres.2016.12.013.
48. Foster WG, Cheung AP, Davis K, Graves G, Jarrell J, Leblanc A, et al. 2012. Circulating metals and persistent organic pollutant concentrations in Canadian and non-Canadian born primiparous women from five Canadian centres: results of a pilot biomonitoring study. *Sci Total Environ* 435-436:326-336. PMID: 22863808, 10.1016/j.scitotenv.2012.06.070.
49. Dix-Cooper L, Kosatsky T. 2018. Blood mercury, lead and cadmium levels and determinants of exposure among newcomer South and East Asian women of reproductive age living in Vancouver, Canada. *Sci Total Environ* 619-620:1409-1419. PMID: 29734617, 10.1016/j.scitotenv.2017.11.126.
50. Ettinger AS, Arbuckle TE, Fisher M, Liang CL, Davis K, Cirtiu CM, et al. 2017. Arsenic levels among pregnant women and newborns in Canada: results from the maternal-infant research on environmental chemicals (MIREC) cohort. *Environmental research* 153:8-16. PMID: 27880879, 10.1016/j.envres.2016.11.008.

51. Fisher M, Arbuckle TE, Liang CL, LeBlanc A, Gaudreau E, Foster WG, et al. 2016. Concentrations of persistent organic pollutants in maternal and cord blood from the maternal-infant research on environmental chemicals (MIREC) cohort study. *Environ Health* 15(1):59. PMID: 27142700, 10.1186/s12940-016-0143-y.
52. Ruiz-Tudela L, Vazquez-Lopez MA, Garcia-Escobar I, Cabrera-Sevilla JE, Gomez-Bueno S, Martin-Gonzalez M, et al. 2021. Blood lead level in a paediatric population of South-Eastern Spain and associated risk factors. *International journal of environmental research and public health* 18(4):1825. PMID: 33668485, 10.3390/ijerph18041825.
53. Jiang CB, Hsi HC, Fan CH, Chien LC. 2014. Fetal exposure to environmental neurotoxins in Taiwan. *PLoS One* 9(10):e109984. PMID: 25299345, 10.1371/journal.pone.0109984.
54. Bradman A, Fenster L, Sjodin A, Jones RS, Patterson DG, Jr., Eskenazi B. 2007. Polybrominated diphenyl ether levels in the blood of pregnant women living in an agricultural community in California. *Environmental health perspectives* 115(1):71-74. PMID: 17366822, 10.1289/ehp.8899.
55. van Wendel de Joode B, Mora AM, Cordoba L, Cano JC, Quesada R, Faniband M, et al. 2014. Aerial application of mancozeb and urinary ethylene thiourea (ETU) concentrations among pregnant women in Costa Rica: the Infants' Environmental Health Study (ISA). *Environmental health perspectives* 122(12):1321-1328. PMID: 25198283, 10.1289/ehp.1307679.
58. Araya F, Stingone JA, Claudio L. 2021. Inequalities in exposure to ambient air neurotoxicants and disparities in markers of neurodevelopment in children by maternal nativity status. *International journal of environmental research and public health* 18(14). PMID: 34299963, 10.3390/ijerph18147512.
59. Chakraborty J. 2021. Children's exposure to vehicular pollution: environmental injustice in Texas, USA. *Environmental research* 204(Pt A):112008. PMID: 34492280, 10.1016/j.envres.2021.112008.
60. Christidis T, Erickson AC, Pappin AJ, Crouse DL, Pinault LL, Weichenthal SA, et al. 2019. Low concentrations of fine particle air pollution and mortality in the Canadian Community Health Survey cohort. *Environ Health* 18(1):84. PMID: 31601202, 10.1186/s12940-019-0518-y.
61. Elford S, Adams MD. 2021. Associations between socioeconomic status and ultrafine particulate exposure in the school commute: An environmental inequality study for Toronto, Canada. *Environmental research* 192:110224. PMID: 32949617, 10.1016/j.envres.2020.110224.



62. Fong KC, Bell ML. 2021. Do fine particulate air pollution (PM2.5) exposure and its attributable premature mortality differ for immigrants compared to those born in the United States? *Environmental research* 196:110387. PMID: 33129853, 10.1016/j.envres.2020.110387.
63. Erickson AC, Christidis T, Pappin A, Brook JR, Crouse DL, Hystad P, et al. 2020. Disease assimilation: the mortality impacts of fine particulate matter on immigrants to Canada. *Health Rep* 31(3):14-26. PMID: 32644760, 10.25318/82-003-x202000300002-eng.
64. Ard K, Fisher-Garibay D, Bonner D. 2021. Particulate matter exposure across Latino ethnicities. *International journal of environmental research and public health* 18(10). PMID: 34068230, 10.3390/ijerph18105186.
65. Brauer M, Brook JR, Christidis T, Chu Y, Crouse DL, Erickson A, et al. 2019. Mortality-air pollution associations in low-exposure environments (MAPLE): phase 1. *Res Rep Health Eff Inst*(203):1-87. PMID: 31909580.
66. Grineski S, Collins T, Renteria R, Rubio R. 2021. Multigenerational immigrant trajectories and children's unequal exposure to fine particulate matter in the US. *Soc Sci Med* 282:114108. PMID: 34144435, 10.1016/j.socscimed.2021.114108.
67. Grineski SE, Collins T. 2019. Lifetime cancer risks from hazardous air pollutants in US public school districts. *Journal of epidemiology and community health* 73(9):854-860. PMID: 31201256, 10.1136/jech-2018-211832.
68. Grineski SE, Collins TW, Chakraborty J, Montgomery M. 2017. Hazard characteristics and patterns of environmental injustice: household-level determinants of environmental risk in Miami, Florida. *Risk Anal* 37(7):1419-1434. PMID: 27760278, 10.1111/risa.12706.
69. Hillemeier MM, Landale NS, Oropesa RS. 2015. Asthma in US Mexican-origin children in early childhood: differences in risk and protective factors by parental nativity. *Acad Pediatr* 15(4):421-429. PMID: 25613912, 10.1016/j.acap.2014.11.005.
70. Loustaunau MG, Chakraborty J. 2019. Vehicular air pollution in Houston, Texas: an intra-categorical analysis of environmental injustice. *International journal of environmental research and public health* 16(16). PMID: 31426575, 10.3390/ijerph16162968.
71. Padula AM, Yang W, Carmichael SL, Lurmann F, Balmes J, Hammond SK, et al. 2017. Air pollution, neighborhood acculturation factors, and neural tube defects among Hispanic women in California. *Birth Defects Res* 109(6):403-422. PMID: 28398703, 10.1002/bdra.23602.

72. Pinault L, van Donkelaar A, Martin RV. 2017. Exposure to fine particulate matter air pollution in Canada. *Health Rep* 28(3):9-16. PMID: 28295129.
73. Quach T, Garcia E, Von Behren J, Tran J, Tran TD, Fu L, et al. 2015. Environmental street audits and black carbon measurements in Vietnamese immigrant communities. *Prog Community Health Partnersh* 9(2):179-190. PMID: 26412760, 10.1353/cpr.2015.0036.
74. Rhee J, Fabian MP, Ettinger de Cuba S, Coleman S, Sandel M, Lane KJ, et al. 2019. Effects of maternal homelessness, supplemental nutrition programs, and prenatal PM2.5 on birthweight. *International journal of environmental research and public health* 16(21). PMID: 31661898, 10.3390/ijerph16214154.
76. Mercereau L, Todd N, Rey G, Valleron AJ. 2017. Comparison of the temperature-mortality relationship in foreign born and native born died in France between 2000 and 2009. *Int J Biometeorol* 61(10):1873-1884. PMID: 28540492, 10.1007/s00484-017-1373-6.
77. Fong KC, Mehta NK, Bell ML. 2020. Disparities in exposure to surrounding greenness related to proportion of the population that were immigrants to the United States. *Int J Hyg Environ Health* 224:113434. PMID: 31978731, 10.1016/j.ijheh.2019.113434.
78. Kamel AA, Ford PB, Kaczynski AT. 2014. Disparities in park availability, features, and characteristics by social determinants of health within a U.S.-Mexico border urban area. *Prev Med* 69 Suppl 1:S111-113. PMID: 25451326, 10.1016/j.ypmed.2014.10.001.
79. Maldonado A, Collins TW, Grineski SE, Chakraborty J. 2016. Exposure to flood hazards in Miami and Houston: are Hispanic immigrants at greater risk than other social groups? *International journal of environmental research and public health* 13(8). PMID: 27490561, 10.3390/ijerph13080775.
80. Rodriguez-Loureiro L, Casas L, Bauwelinck M, Lefebvre W, Vanpoucke C, Vanroelen C, et al. 2021. Social inequalities in the associations between urban green spaces, self-perceived health and mortality in Brussels: results from a census-based cohort study. *Health Place* 70:102603. PMID: 34166885, 10.1016/j.healthplace.2021.102603.
81. Alahmad B, Shakarchi AF, Khraishah H, Alseaidan M, Gasana J, Al-Hemoud A, et al. 2020. Extreme temperatures and mortality in Kuwait: who is vulnerable? *Sci Total Environ* 732:139289. PMID: 32438154, 10.1016/j.scitotenv.2020.139289.
82. Holman CD, Armstrong BK. 1984. Cutaneous malignant melanoma and indicators of total accumulated exposure to the sun: an analysis separating histogenetic types. *J Natl Cancer Inst* 73(1):75-82. PMID: 6588237.
83. Simonelli G, Dudley KA, Weng J, Gallo LC, Perreira K, Shah NA, et al. 2017. Neighborhood factors as predictors of poor sleep in the Sueno Ancillary Study of the Hispanic Community Health Study/Study of Latinos. *Sleep* 40(1):zsw025. PMID: 28364454, 10.1093/sleep/zsw025.

84. Taylor EV, Vaidyanathan A, Flanders WD, Murphy M, Spencer M, Noe RS. 2018. Differences in heat-related mortality by citizenship status: United States, 2005-2014. *Am J Public Health* 108(S2):S131-S136. PMID: 29072944, 10.2105/AJPH.2017.304006.
85. Bakhtsiyarava M, Nawrotzki RJ. 2017. Environmental inequality and pollution advantage among immigrants in the United States. *Appl Geogr* 81:60-69. PMID: 28484286, 10.1016/j.apgeog.2017.02.013.
