# Supplementary material
Source: PubMed Central journal article supplement (PMC9438924)
Supplement: ehp9855.smcontents.508.pdf [file ehp9855.smcontents.508.pdf]

**Note to readers with disabilities:** *EHP* strives to ensure that all journal content is accessible to all readers. However, some figures and Supplemental Material published in *EHP* articles may not conform to [508 standards](#) due to the complexity of the information being presented. If you need assistance accessing journal content, please contact [ehp508@niehs.nih.gov](mailto:ehp508@niehs.nih.gov). Our staff will work with you to assess and meet your accessibility needs within 3 working days.

### **Supplemental Material**

#### **The Intersection of Immigrant and Environmental Health: A Scoping Review of Observational Population Exposure and Epidemiologic Studies**

Kelvin C. Fong, Seulkee Heo, Chris C. Lim, Honghyok Kim, Alisha Chan, Whanhee Lee, Rory Stewart, Hayon Michelle Choi, Ji-Young Son, and Michelle L. Bell

#### **Table of Contents**

**Table S1.** Reviewed Studies' Exposure of Interest by Region, Disparity Focus, and Year Published.

**Figure S1.** Identification and Screening of Literature. Figure modeled after the *Preferred Reporting Items for Systematic Reviews and Meta-Analyses (PRISMA)* Guidelines. For inclusion, a study had to explore environmental exposure or environmental exposure health effect disparities between immigrants vs. non-immigrants in a non-randomized setting (*i.e.*, cohort study, case-control study, cross-sectional study, ecologic study, time-series).

#### **PICOS Worksheet and Search Strategy**

#### **References**

**Additional File-** Excel Document
